# Supplementary material for: Superhydrophobicity of hierarchical ZnO nanowire coatings
Source: Royal Society of Chemistry journal article supplement (doi:10.1039/c3ta14102k), 2013-12-18
Supplement: c3ta14102k.pdf [file c3ta14102k.pdf]

## Superhydrophobicity of Hierarchical ZnO Nanowire Coatings

Mao-Gang Gong<sup>\*a,c</sup>, Zhou Yang<sup>b</sup>, Xiao-Liang Xu<sup>b</sup>, Daniel Jasion<sup>a</sup>, Shin Mou<sup>d</sup>, Hong-Di Zhang<sup>c</sup>,  
Yun-Ze Long<sup>\*c</sup> and Shenqiang Ren<sup>\*a</sup>

<sup>a</sup> Department of Chemistry, University of Kansas, Lawrence, Kansas 66045, United States

<sup>b</sup> Department of Physics, University of Science and Technology of China, Hefei 230026, China

<sup>c</sup> College of Physics, Qingdao University, Qingdao, 266071, China

<sup>d</sup> Functional Materials Division, Air Force Research Laboratory, Dayton, Ohio 45433, United States

\*E-mails: [gongmaogang207@163.com](mailto:gongmaogang207@163.com) (M.G. Gong), [yunze.long@163.com](mailto:yunze.long@163.com) (Y.Z. Long) and [shenqiang@ku.edu](mailto:shenqiang@ku.edu) (S.Q. Ren)

### Supporting Information:

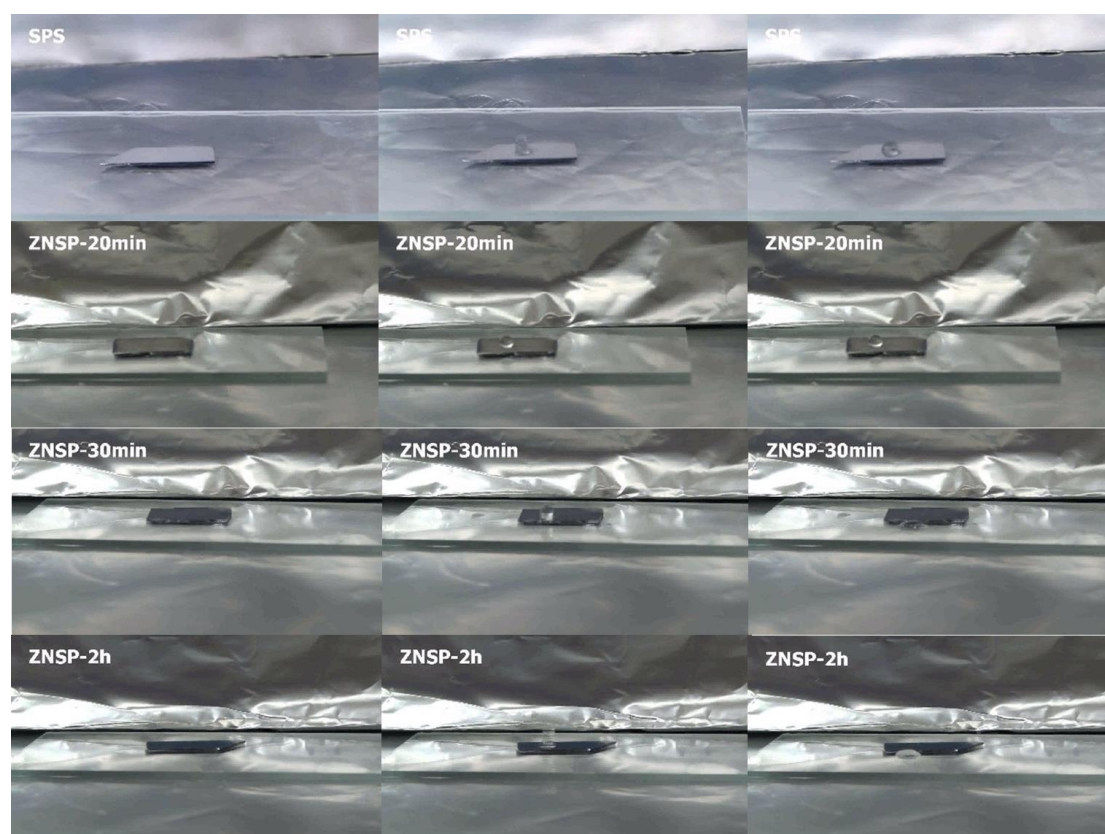

Figure S1. Slices of movie displaying the movement of a simulated raindrop on the different nano-scale hierarchical structure surfaces. 4  $\mu$ L water drops were released from rest at height of 5cm.

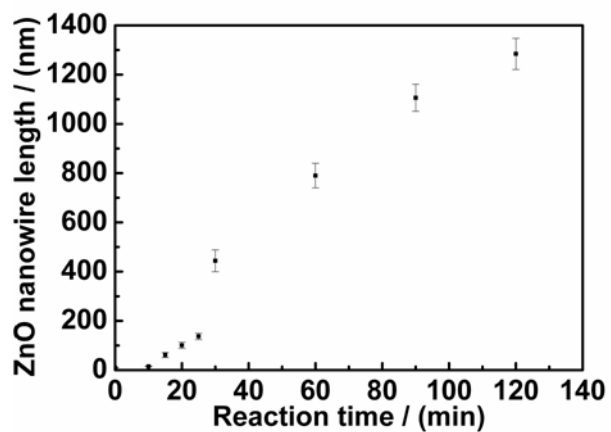

Figure S2. Relationship between ZnO nanowire length and growth time, with the variation range of the nanowire length indicated by the error bars.

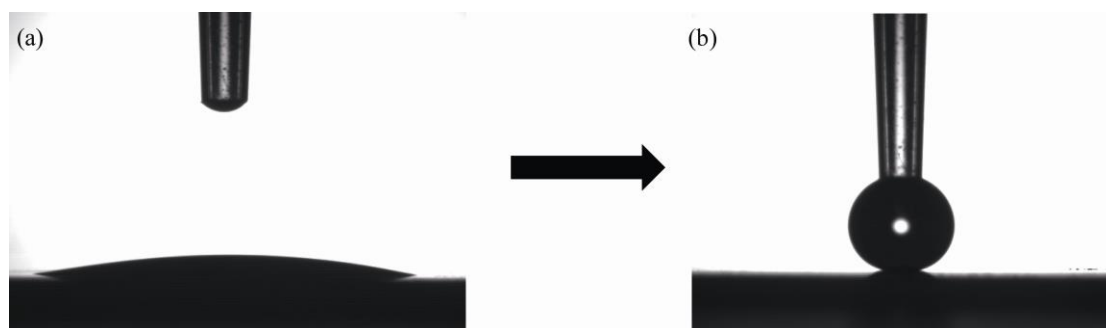

Figure S3. Water contact angle on the (a) as-grown ZNSPs-30min and (b) ZNSP-30min modified by PFOS, respectively.

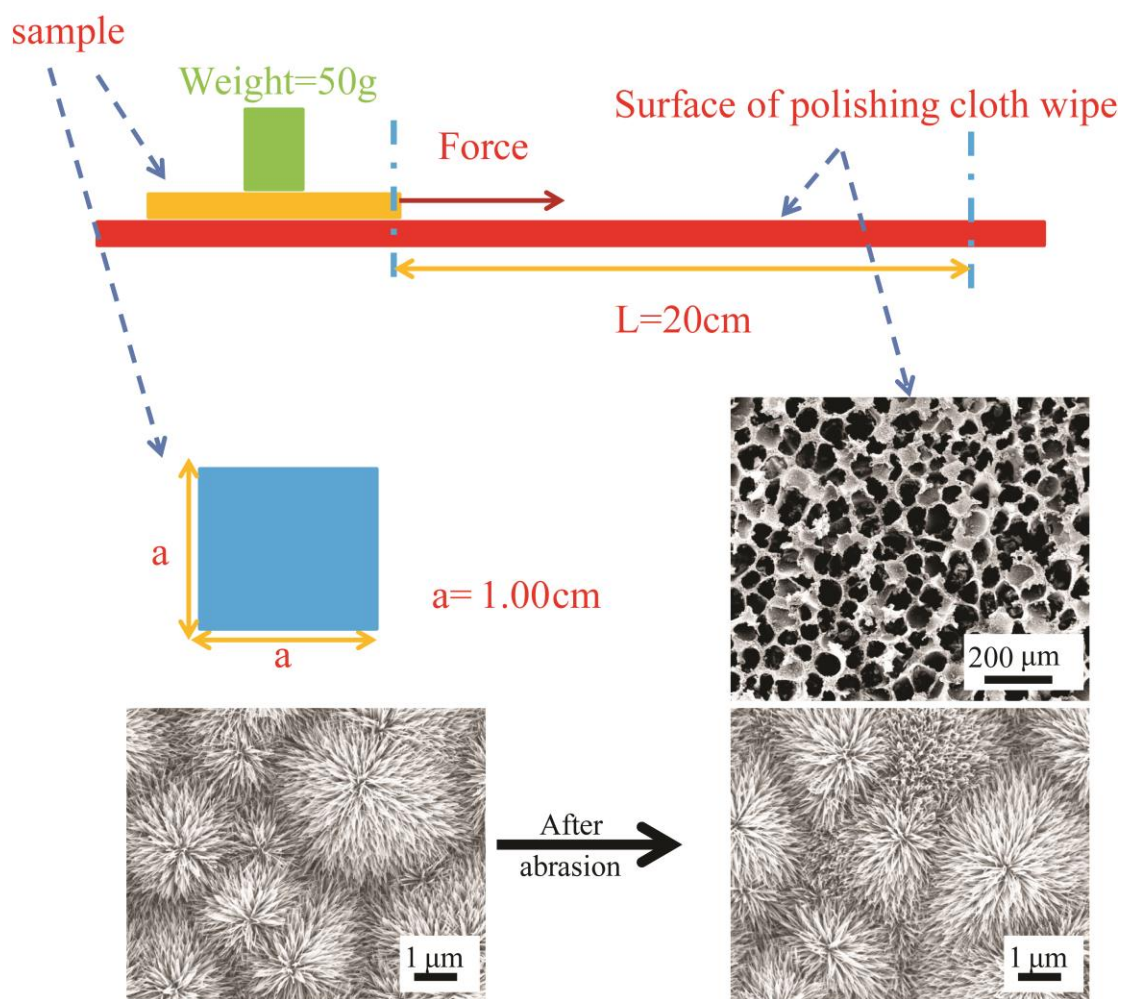

Figure S4. Schematic of the abrasion test employed to evaluate robustness of hierarchical ZnO nanowires coatings. Inset: SEM images of the surface morphology of polishing cloth and ZnO nanowires/Si micro-pyramids surface before and after abrasion.
